# Supplementary material for: Chiral Jahn–Teller Distortion in Quasi-Planar Boron Clusters
Source: MDPI journal article supplement (doi:10.3390/molecules29071624), 2024-04-04
Supplement: s1 [file s1]

## Chiral Jahn-Teller Distortion in Quasi-Planar Boron Clusters

Dongbo Zhao<sup>1,\*</sup>, Yilin Zhao<sup>2</sup>, Tianlv Xu<sup>3</sup>, Xin He<sup>4</sup>, Shankai Hu<sup>1</sup>,  
Paul W. Ayers<sup>2,\*</sup> and Shubin Liu<sup>5,6,\*</sup>

<sup>1</sup>Institute of Biomedical Research, Yunnan University, Kunming 650500, Yunnan, China

<sup>2</sup>Department of Chemistry and Chemical Biology, McMaster University, Hamilton, ON L8S 4M1 Canada

<sup>3</sup>College of Chemistry and Chemical Engineering, Hunan Normal University, Changsha, Hunan 410081, China

<sup>4</sup>Qingdao Institute for Theoretical and Computational Sciences, Shandong University, Qingdao 266237, China

<sup>5</sup>Research Computing Center, University of North Carolina, Chapel Hill, North Carolina 27599-3420, USA

<sup>6</sup>Department of Chemistry, University of North Carolina, Chapel Hill, North Carolina 27599-3290, USA

\*Correspondence:

dongbo@ynu.edu.cn (D.Z.);

ayers@mcmaster.ca (P.W.A.);

shubin@email.unc.edu (S.L.).

**Table S1.** The coefficients of the fitted planes.

| species      | A        | B        | C        | D        |
|--------------|----------|----------|----------|----------|
| $^2B_{16}^-$ | 0.00000  | 0.00000  | 1.00000  | 0.00000  |
| $^2B_{20}^-$ | 0.00000  | 0.00000  | 1.00000  | 0.00000  |
| $^2B_{24}^-$ | -0.99999 | -0.00378 | -0.00000 | -0.00000 |
| $^2B_{28}^-$ | 0.00000  | 0.00000  | 1.00000  | -0.00000 |
| $^4B_{16}^-$ | 0.00000  | -0.00000 | 1.00000  | 0.00000  |
| $^4B_{20}^-$ | 0.00000  | -0.00000 | 1.00000  | 0.00000  |
| $^4B_{24}^-$ | 1.00000  | -0.00275 | 0.00000  | -0.00000 |
| $^4B_{28}^-$ | -0.00001 | 0.00006  | -1.00000 | 0.00000  |

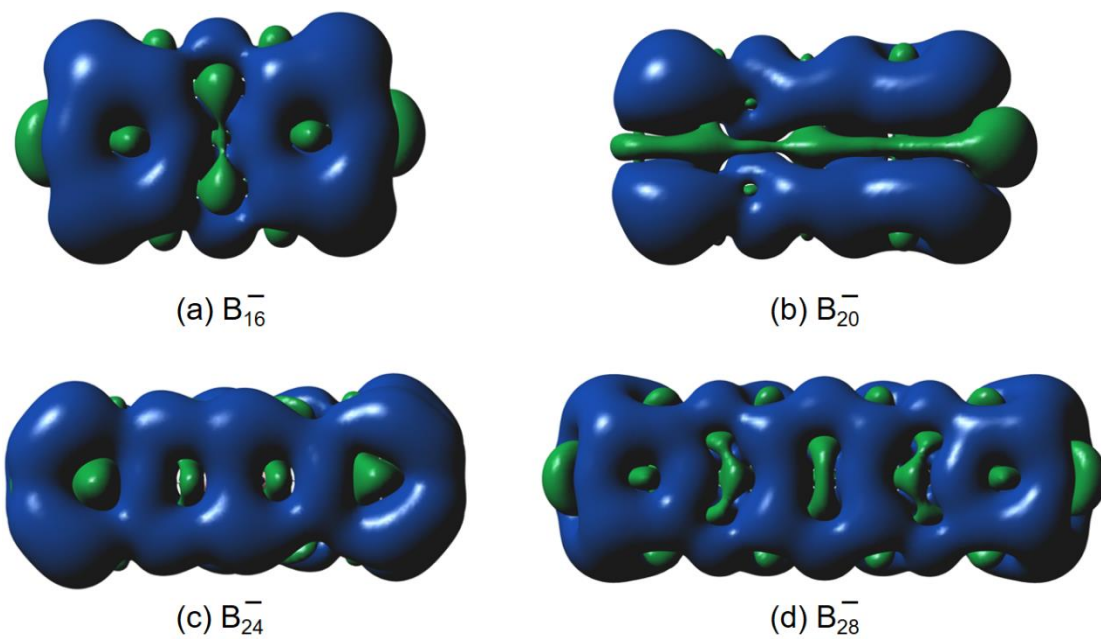

**Figure S1.** Shown here are the spin density maps of excited-state (a)  ${}^4B_{16}^-$ , (b)  ${}^4B_{20}^-$ , (c)  ${}^4B_{24}^-$ , and (d)  ${}^4B_{28}^-$  obtained at the PBE0/6-311+G(d) level. The isovalue was set to be 0.0004 a.u.

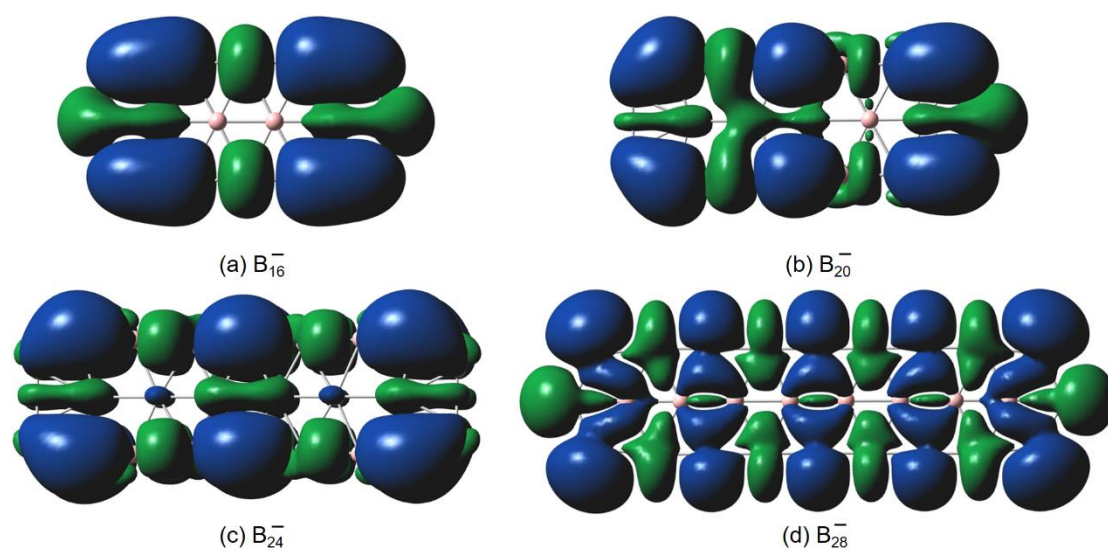

**Figure S2.** Shown here are the spin density maps of ground-state (a)  ${}^2B_{16}^-$ , (b)  ${}^2B_{20}^-$ , (c)  ${}^2B_{24}^-$ , and (d)  ${}^2B_{28}^-$  obtained at the PBE0/6-311+G(d) level with boron atoms forced to be in a plane. The isovalue was set to be 0.0004 a.u.

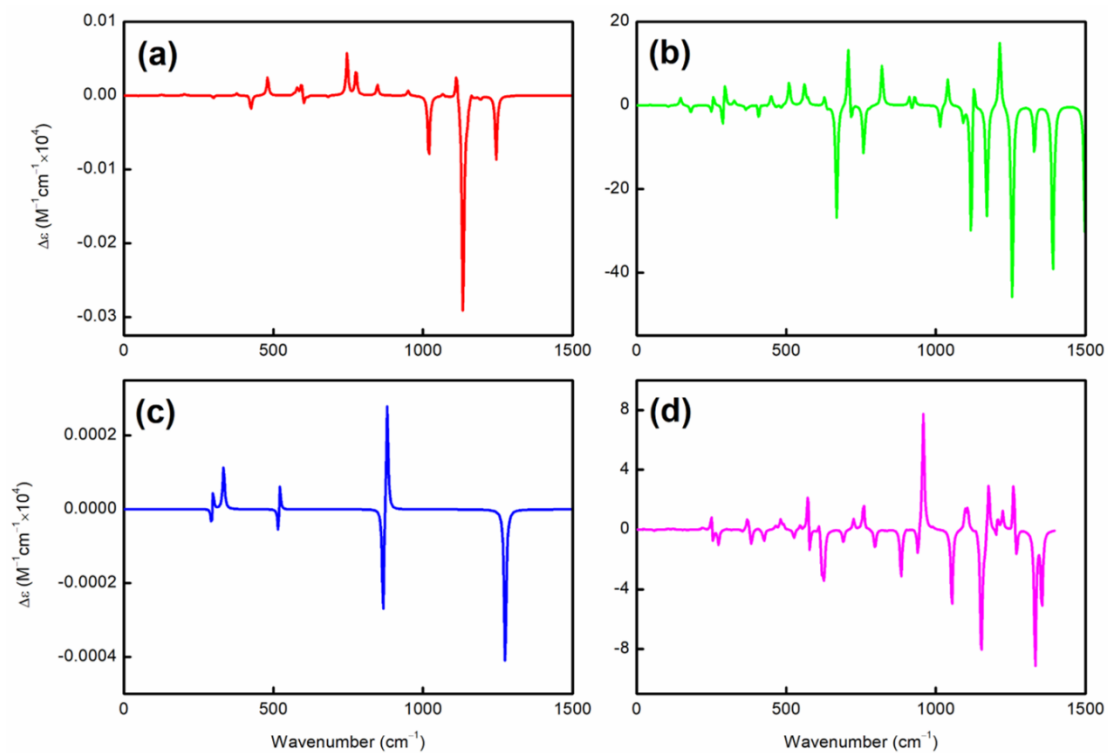

**Figure S3.** Excited-state VCD spectra of (a)  ${}^4\text{B}_{16}^{+}$ , (b)  ${}^4\text{B}_{20}^{-}$ , (c)  ${}^4\text{B}_{24}^{+}$  and (d)  ${}^4\text{B}_{28}^{-}$  obtained at the PBE0/6-311+G(d) level. The  $x/y$ -axis spans from (a) to (d).

${}^2\mathbf{B}_{16}$ 

|   |             |             |             |
|---|-------------|-------------|-------------|
| B | 0.76706500  | -0.00001200 | 0.01605200  |
| B | -0.76706000 | 0.00001700  | -0.01615800 |
| B | 2.37466600  | -0.00002500 | 0.22121500  |
| B | -2.37468300 | 0.00002900  | -0.22115200 |
| B | 3.96019200  | -0.00000900 | -0.07694600 |
| B | -3.96018500 | 0.00001000  | 0.07709700  |
| B | 3.21095700  | -1.40875300 | -0.05721800 |
| B | 3.21097200  | 1.40874200  | -0.05700100 |
| B | -3.21094500 | 1.40875400  | 0.05736100  |
| B | -3.21095800 | -1.40874200 | 0.05717500  |
| B | 1.63741300  | -1.61594400 | 0.04092400  |
| B | 1.63744700  | 1.61594300  | 0.04116200  |
| B | -1.63741400 | 1.61594200  | -0.04104800 |
| B | -1.63745900 | -1.61595200 | -0.04137700 |
| B | 0.00003400  | 1.56311700  | -0.00051500 |
| B | -0.00004200 | -1.56311700 | 0.00042900  |

 ${}^2\mathbf{B}_{20}$ 

|   |             |             |             |
|---|-------------|-------------|-------------|
| B | -1.07844700 | -1.54869500 | 0.02466900  |
| B | 2.11279500  | -1.59892500 | 0.02171000  |
| B | 0.52838800  | 1.50991300  | -0.01282000 |
| B | -0.26223600 | -0.00000700 | 0.11042100  |
| B | -4.28634900 | -1.38518900 | -0.11941800 |
| B | 3.19474400  | -0.00000200 | -0.00594300 |
| B | -2.69738600 | 1.55696800  | 0.02350400  |
| B | -4.28635600 | 1.38519000  | -0.11940500 |
| B | -5.05518400 | 0.00000100  | -0.08454500 |
| B | -1.07845900 | 1.54868100  | 0.02457500  |
| B | 3.64586700  | -1.75530700 | -0.00356300 |
| B | 3.64587500  | 1.75530300  | -0.00371100 |
| B | 4.80354600  | 0.77090700  | -0.02350100 |
| B | 4.80353900  | -0.77090900 | -0.02324400 |
| B | 1.39399200  | 0.00000200  | -0.10212600 |
| B | -2.69737600 | -1.55696100 | 0.02350300  |

|   |             |             |             |
|---|-------------|-------------|-------------|
| B | -3.46381700 | 0.00000000  | 0.26319200  |
| B | 0.52838400  | -1.50990700 | -0.01312500 |
| B | -1.86432600 | -0.00000400 | -0.00196100 |
| B | 2.11280300  | 1.59894000  | 0.02178700  |

${}^2\mathbf{B}_{24}^-$

|   |             |             |             |
|---|-------------|-------------|-------------|
| B | 0.00147700  | 4.27685400  | 0.00000000  |
| B | -0.04193200 | 2.48783100  | 0.00000000  |
| B | 0.03382600  | 0.81571200  | 0.00000000  |
| B | -0.03382600 | -0.81571200 | 0.00000000  |
| B | 0.04193200  | -2.48783100 | 0.00000000  |
| B | -0.00147700 | -4.27685400 | 0.00000000  |
| B | 0.02969600  | -4.72724800 | 1.74871500  |
| B | 0.03436800  | -3.18798800 | -1.60276300 |
| B | 0.03436800  | -3.18798800 | 1.60276300  |
| B | -0.03436800 | 3.18798800  | -1.60276300 |
| B | -0.03436800 | 3.18798800  | 1.60276300  |
| B | -0.01643000 | 1.60824700  | 1.49040200  |
| B | -0.01643000 | 1.60824700  | -1.49040200 |
| B | 0.01643000  | -1.60824700 | -1.49040200 |
| B | 0.01643000  | -1.60824700 | 1.49040200  |
| B | 0.00000000  | 0.00000000  | -1.52771600 |
| B | 0.00000000  | 0.00000000  | 1.52771600  |
| B | 0.00000000  | -5.89379500 | 0.76474100  |
| B | 0.00000000  | -5.89379500 | -0.76474100 |
| B | 0.02969600  | -4.72724800 | -1.74871500 |
| B | -0.02969600 | 4.72724800  | -1.74871500 |
| B | 0.00000000  | 5.89379500  | -0.76474100 |
| B | 0.00000000  | 5.89379500  | 0.76474100  |
| B | -0.02969600 | 4.72724800  | 1.74871500  |

${}^2\mathbf{B}_{28}^-$

|   |            |             |             |
|---|------------|-------------|-------------|
| B | 4.01886100 | -0.00008000 | -0.13718200 |
| B | 2.41969300 | 0.00001300  | 0.12861200  |
| B | 0.82288100 | 0.00004500  | -0.13829500 |

|   |             |             |             |
|---|-------------|-------------|-------------|
| B | -0.81367400 | 0.00006000  | 0.00714500  |
| B | -2.42185300 | -0.00000400 | 0.01169500  |
| B | -4.01398100 | 0.00000500  | -0.13793700 |
| B | -4.85032400 | -1.55340300 | 0.00577500  |
| B | -3.23445000 | 1.54558900  | -0.03831800 |
| B | -3.23443600 | -1.54555000 | -0.03854300 |
| B | 3.23581900  | 1.54700700  | -0.03810600 |
| B | 3.23574500  | -1.54703300 | -0.03777000 |
| B | 1.61186400  | -1.53721700 | -0.05652500 |
| B | 1.61189900  | 1.53731800  | -0.05679500 |
| B | -1.60443000 | 1.53892200  | -0.04162700 |
| B | -1.60439300 | -1.53879300 | -0.04198900 |
| B | 0.00350000  | 1.52939600  | -0.05206100 |
| B | 0.00351200  | -1.52924800 | -0.05209800 |
| B | -4.85032200 | 1.55332700  | 0.00633300  |
| B | 4.84452500  | 1.54710400  | 0.01165800  |
| B | 4.84447800  | -1.54708300 | 0.01212700  |
| B | -5.59739900 | -0.00005600 | 0.18212100  |
| B | -6.46588100 | 1.39223800  | 0.03364800  |
| B | -6.46585300 | -1.39232600 | 0.03317800  |
| B | -7.21668500 | -0.00004800 | 0.09765900  |
| B | 5.59347100  | 0.00001400  | 0.30182100  |
| B | 7.21520300  | -0.00004800 | 0.08255300  |
| B | 6.45610600  | 1.37667300  | -0.02382800 |
| B | 6.45612300  | -1.37682100 | -0.02325000 |

---

| ${}^4\mathbf{B}_{16}^-$ |             |             |             |
|-------------------------|-------------|-------------|-------------|
| B                       | 0.79392500  | 0.00001400  | 0.04744400  |
| B                       | -0.79387000 | -0.00001400 | -0.04440400 |
| B                       | 2.38837300  | -0.00000500 | -0.01688900 |
| B                       | -2.38842100 | 0.00000500  | 0.01643100  |
| B                       | 4.01377200  | 0.00000300  | -0.00438200 |
| B                       | -4.01381400 | -0.00000200 | 0.00184900  |
| B                       | 3.26175000  | 1.39677500  | -0.00075500 |
| B                       | 3.26175400  | -1.39677400 | -0.00074200 |
| B                       | -3.26176500 | -1.39678000 | -0.00069000 |
| B                       | -3.26177100 | 1.39677900  | -0.00073300 |
| B                       | 1.63338200  | 1.55245700  | 0.00521000  |
| B                       | 1.63338800  | -1.55245700 | 0.00529900  |
| B                       | -1.63336300 | -1.55246600 | -0.00439500 |
| B                       | -1.63337100 | 1.55246800  | -0.00453300 |
| B                       | 0.00001200  | -1.55535200 | 0.00050600  |
| B                       | 0.00002000  | 1.55535000  | 0.00078200  |
|                         |             |             |             |
| ${}^4\mathbf{B}_{20}^-$ |             |             |             |
| B                       | 1.07373300  | 1.53640600  | -0.07100500 |
| B                       | -2.10017800 | 1.62724900  | -0.00369800 |
| B                       | -0.53584400 | -1.52509400 | -0.03820100 |
| B                       | 0.25898400  | -0.00043800 | -0.03762100 |
| B                       | 4.31917200  | 1.40714600  | 0.11120200  |
| B                       | -3.22526500 | 0.00020200  | 0.04530100  |
| B                       | 2.71546900  | -1.57122200 | -0.01288100 |
| B                       | 4.31845500  | -1.40679100 | 0.12323200  |
| B                       | 5.05770000  | 0.00011600  | 0.17887500  |
| B                       | 1.07390200  | -1.53622100 | -0.06000300 |
| B                       | -3.65974400 | 1.75116000  | 0.03707200  |
| B                       | -3.66009700 | -1.75062000 | 0.01325700  |
| B                       | -4.81847300 | -0.77210800 | 0.07709200  |
| B                       | -4.81827100 | 0.77193800  | 0.08787200  |
| B                       | -1.40987700 | 0.00009100  | -0.07990800 |
| B                       | 2.71602400  | 1.57099700  | -0.02525300 |

|   |             |             |             |
|---|-------------|-------------|-------------|
| B | 3.48066900  | -0.00032100 | -0.13618500 |
| B | -0.53535700 | 1.52542600  | -0.04951100 |
| B | 1.84941800  | -0.00083500 | -0.14347900 |
| B | -2.10042100 | -1.62707900 | -0.01616000 |

${}^4\mathbf{B}_{24}^-$

|   |             |             |             |
|---|-------------|-------------|-------------|
| B | 0.00656100  | 4.26979600  | 0.00000000  |
| B | -0.09142000 | 2.47428100  | 0.00000000  |
| B | 0.07134500  | 0.83334000  | 0.00000000  |
| B | -0.07134500 | -0.83334000 | 0.00000000  |
| B | 0.09142000  | -2.47428100 | 0.00000000  |
| B | -0.00656100 | -4.26979600 | 0.00000000  |
| B | -0.02774400 | -4.71810400 | 1.75756400  |
| B | -0.04559800 | -3.17106000 | -1.64607500 |
| B | -0.04559800 | -3.17106000 | 1.64607500  |
| B | 0.04559800  | 3.17106000  | -1.64607500 |
| B | 0.04559800  | 3.17106000  | 1.64607500  |
| B | 0.01169800  | 1.60200900  | 1.50465700  |
| B | 0.01169800  | 1.60200900  | -1.50465700 |
| B | -0.01169800 | -1.60200900 | -1.50465700 |
| B | -0.01169800 | -1.60200900 | 1.50465700  |
| B | 0.00000000  | 0.00000000  | -1.55079700 |
| B | 0.00000000  | 0.00000000  | 1.55079700  |
| B | 0.00000000  | -5.87439100 | 0.77736900  |
| B | 0.00000000  | -5.87439100 | -0.77736900 |
| B | -0.02774400 | -4.71810400 | -1.75756400 |
| B | 0.02774400  | 4.71810400  | -1.75756400 |
| B | 0.00000000  | 5.87439100  | -0.77736900 |
| B | 0.00000000  | 5.87439100  | 0.77736900  |
| B | 0.02774400  | 4.71810400  | 1.75756400  |

${}^4\mathbf{B}_{28}^-$

|   |             |             |             |
|---|-------------|-------------|-------------|
| B | -4.00448800 | -0.00003700 | -0.00691000 |
| B | -2.42460400 | 0.00074100  | -0.12150100 |
| B | -0.80386200 | 0.00007800  | 0.02931900  |

|   |             |             |             |
|---|-------------|-------------|-------------|
| B | 0.80340800  | -0.00033400 | 0.03028600  |
| B | 2.42428700  | -0.00043300 | -0.11378600 |
| B | 4.00406300  | -0.00016600 | -0.00603600 |
| B | 4.85282100  | -1.57091800 | -0.00387200 |
| B | 3.21401200  | 1.55435800  | -0.03699300 |
| B | 3.21402500  | -1.55540000 | -0.02928600 |
| B | -3.21407600 | 1.55630700  | -0.03482900 |
| B | -3.21408300 | -1.55527700 | -0.04368800 |
| B | -1.61371600 | -1.57277700 | -0.03881000 |
| B | -1.61348000 | 1.57273500  | -0.03485900 |
| B | 1.61337800  | 1.57403800  | -0.03287000 |
| B | 1.61330300  | -1.57331100 | -0.02893800 |
| B | 0.00006900  | 1.53317600  | -0.03583500 |
| B | -0.00026200 | -1.53276900 | -0.03553200 |
| B | 4.85302300  | 1.57077500  | -0.01376700 |
| B | -4.85270800 | 1.57027800  | -0.00493600 |
| B | -4.85281000 | -1.57026200 | -0.01528100 |
| B | 5.60423900  | -0.00091000 | -0.21048800 |
| B | 6.43051200  | 1.39738600  | 0.14862600  |
| B | 6.43028500  | -1.39682600 | 0.15835700  |
| B | 7.18819400  | 0.00038800  | 0.18541700  |
| B | -5.60493200 | 0.00082900  | -0.21174100 |
| B | -7.18744500 | -0.00066000 | 0.19187900  |
| B | -6.42950700 | 1.39633400  | 0.16312600  |
| B | -6.42964700 | -1.39734800 | 0.15294900  |

---
